# Supplementary material for: The short-chain fatty acid pentanoate suppresses autoimmunity by modulating the metabolic-epigenetic crosstalk in lymphocytes
Source: PubMed Central journal article supplement (PMC6377655; doi:10.1038/s41467-019-08711-2), 2019-02-15
Supplement: 41467_2019_8711_MOESM1_ESM.pdf [file 41467_2019_8711_MOESM1_ESM.pdf]

## **Supplementary Information**

**The short-chain fatty acid pentanoate suppresses autoimmunity by modulating the metabolic-epigenetic crosstalk in lymphocytes**

Luu et al.

## Supplementary Figures

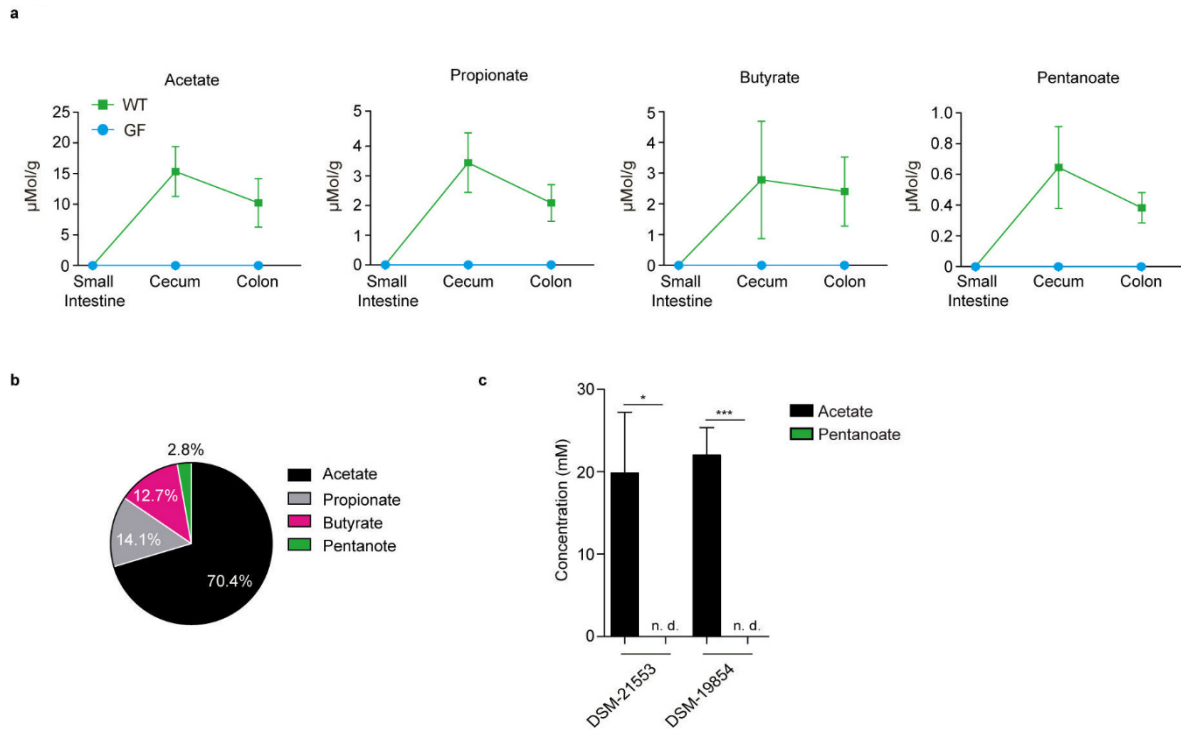

**Supplementary Fig. 1** Microbiota-dependent production of pentanoate. **a** Concentrations of SCFAs in fecal extracts of WT (green squares) and GF (blue circles) mice were determined by UHPLC-MS (n = 4 mice per group). **b** Composition of the SCFAs (acetate, propionate butyrate, and pentanoate) in the cecum of WT mice. **c** Human isolates *Prevotella histicola* (DSM-19854 and DSM-21553) were grown in thioglycollate medium for 5 days. Culture supernatants were analyzed by GC-MS for SCFA production. Error bars indicate SEM, n. d. = not detectable, \* $P < 0.05$ , \*\*\* $P < 0.001$  (Student's *t*-test).

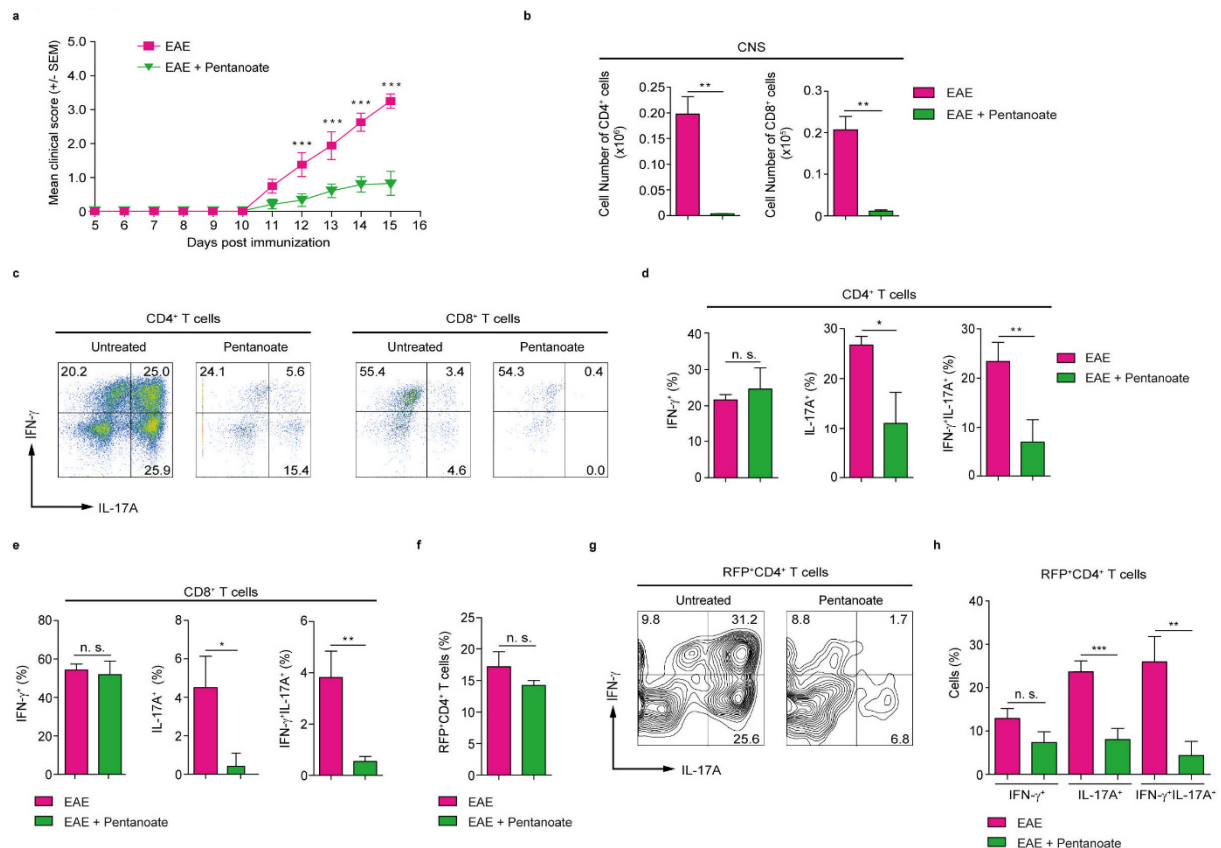

**Supplementary Fig. 2** Pentanoate ameliorates progression of EAE. **a** For induction of EAE, *FIR*  $\times$  *tiger* mice were immunized with MOG. Mice were treated daily with 800 mg pentanoate/kg mouse or left untreated. Two independent experiments were performed (n= 8 mice per group). Mice were monitored daily for EAE progression. The graph represents the EAE development in the presence or absence of pentanoate. **b** Total cell numbers of T lymphocytes in the inflamed CNS after pentanoate treatment. **c-e** Dot plots (**c**) and bar graphs (**d** and **e**) show the frequencies of IFN- $\gamma$ <sup>+</sup>, IL-17A<sup>+</sup> and IFN- $\gamma$ <sup>+</sup>IL-17A<sup>+</sup> cells in the inflamed CNS among CD4<sup>+</sup> and CD8<sup>+</sup> T lymphocytes, respectively. **f** The frequency of Foxp3<sup>+</sup>CD4<sup>+</sup> Tregs in the CNS of mice treated with pentanoate or left untreated. **g, h** Representative contour plots (**g**) and bar graphs (**h**) indicating the frequencies of IFN- $\gamma$ <sup>+</sup>, IL-17A<sup>+</sup> and IFN- $\gamma$ <sup>+</sup>IL-17A<sup>+</sup> cells among RFP<sup>+</sup> Tregs in the CNS after treatment with pentanoate. Error bars indicate SEM. Data are analyzed by one-way ANOVA test. n. s. = not significant, \* $P$  < 0.05, \*\* $P$  < 0.01, \*\*\* $P$  < 0.001.

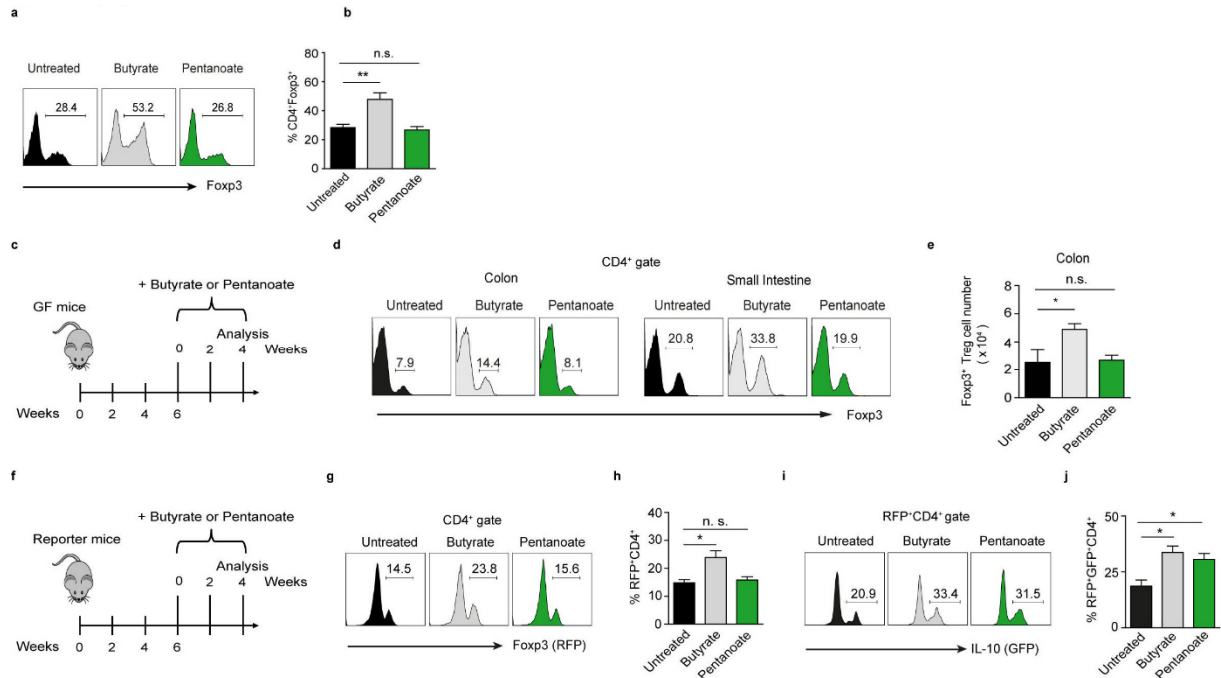

**Supplementary Fig. 3** Pentanoate does not promote expansion of Tregs. **a, b** Flow cytometry analysis of Tregs treated with butyrate or pentanoate (1 mM) for three days. Histograms (**a**) and bar graphs (**b**) show the frequencies of Foxp3<sup>+</sup>CD4<sup>+</sup> T cells. Three independent experiments were performed. **c-e** GF mice were treated orally for 4 weeks with either butyrate or pentanoate (150 mM, n = 8 mice per group). Scheme of oral treatment is shown in (**c**). Dot plots (**d**) display frequencies of intestinal Foxp3<sup>+</sup>CD4<sup>+</sup> T cells. Bar graphs (**d**) represent the total cell numbers of colonic Tregs after oral treatment. **f-j** Oral treatment of *FIR* × *tiger* reporter mice with SCFAs (n = 8 mice per group). Scheme of oral treatment of animals with 150 mM butyrate or pentanoate is shown in (**f**). FACS analysis displaying the frequency of Foxp3<sup>+</sup>CD4<sup>+</sup> T cells in colonic Tregs after SCFA treatment is shown in (**g**) and (**h**). The frequency of IL-10<sup>+</sup> cells within colonic Treg cell population after four weeks of SCFA treatment is shown (**i**) and (**j**). Two independent experiments were performed. Error bars indicate SEM, n.s. = not significant, \**P* < 0.05, \*\**P* < 0.01 (one-way ANOVA test).

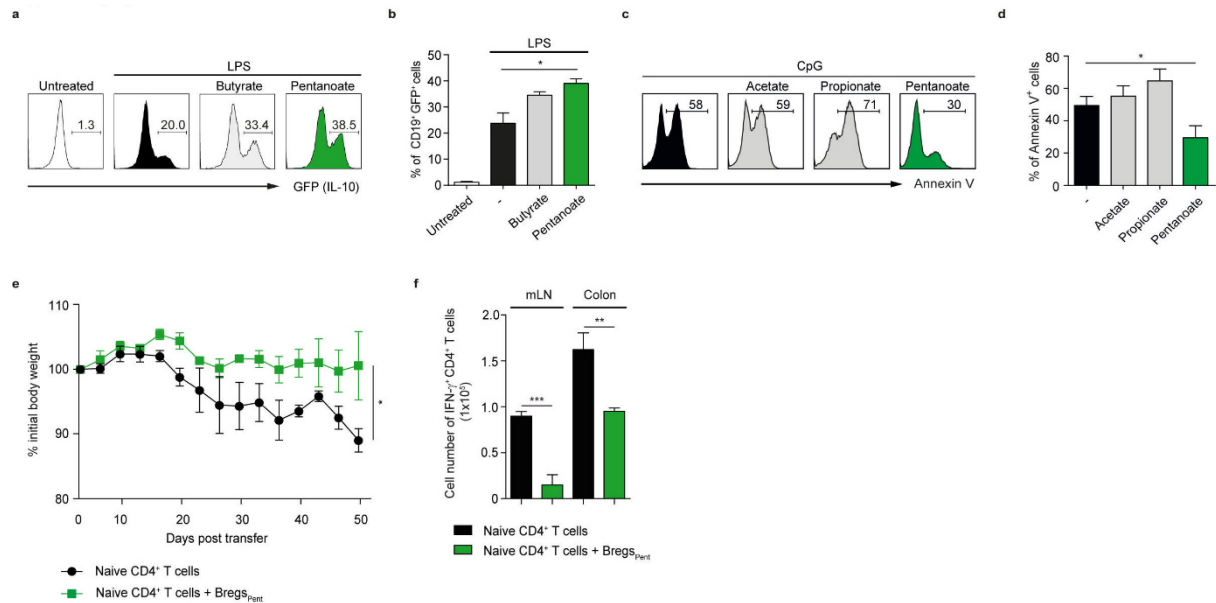

**Supplementary Fig. 4** Pentanoate enhances IL-10 expression in Bregs and protects from T cell-mediated colitis. **a, b** B cells, isolated from spleens of *FIR*  $\times$  *tiger* mice, were activated with 1  $\mu$ g/ml LPS in the presence of 1 mM butyrate or 2.5 mM pentanoate for 3 days. Histograms (**a**) and bar graphs (**b**) show the frequency of IL-10<sup>+</sup> cells. Three experiments were performed. **c, d** Bregs were generated by treating splenic B cells with CpG in the presence or absence of SCFAs (5 mM) for three days. Histograms (**c**) and bar graphs (**d**) display the frequency of Annexin V<sup>+</sup> cells. Three similar experiments were performed. **e**  $5 \times 10^5$  naive CD4<sup>+</sup> T cells were transferred into *Rag1*<sup>-/-</sup> mice to induce T cell-mediated colitis.  $2 \times 10^6$  Bregs treated with pentanoate (Breg<sub>Pent</sub>) were co-transferred on day 0 and 14 after T cell transfer ( $n = 8$  mice per group). The graph represents the change of the initial body weight of recipient mice in the presence or absence of Bregs. **f** Mice were treated as described in (**e**). Cell numbers of IFN- $\gamma$ <sup>+</sup>CD4<sup>+</sup> T cells isolated from mesenteric lymph nodes (mLN) and colon of recipient mice were counted on day 50 after colitis induction. Error bars indicate SEM, \* $P < 0.05$ , \*\* $P < 0.01$ , \*\*\* $P < 0.001$  (Student's *t*-test).

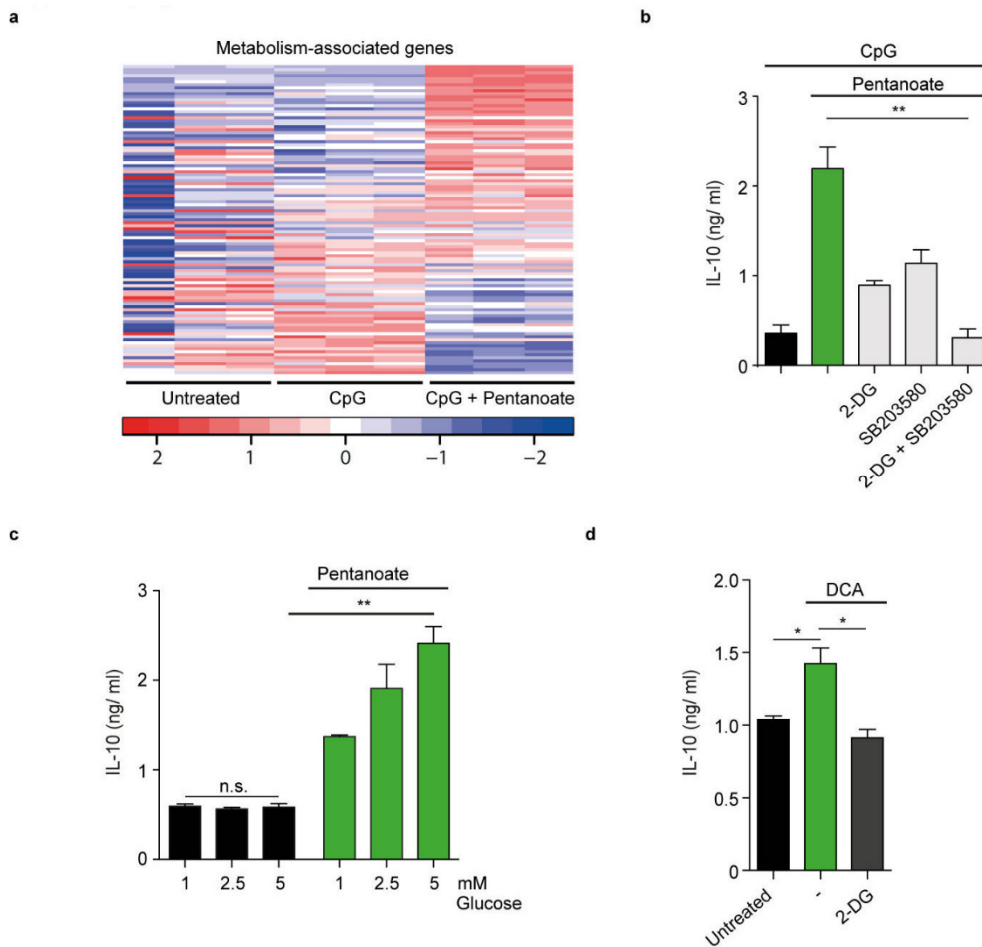

**Supplementary Fig. 5** Impact of pentanoate on the metabolic state of CpG-induced Bregs. **a** Splenic B cells were stimulated with CpG and pentanoate for four days. Heatmap of metabolism-associated genes is shown (A complete list of metabolic genes was published by us previously, Shaul YD *et al.*, Cell, 2014). The FPKM values were z-transformed and plotted. **b** Bregs were generated with 4  $\mu$ g/ml CpG and 5 mM pentanoate in presence of 1 mM 2-DG and 5  $\mu$ M SB203580. IL-10 expression was determined on day 4 of the cell culture by flow cytometry. Three experiments were performed. **c** IL-10 secretion by Bregs treated with increasing amounts of glucose in presence or absence of pentanoate was determined by ELISA. **d** Bregs were generated with 4  $\mu$ g/ml CpG and treated with DCA (5 mM) in the presence or absence of 2-DG (1 mM) for three days. IL-10 production was measured by ELISA. Error bars indicate SEM, n. s. = not significant, \* $P < 0.05$ , \*\* $P < 0.01$  (Student's *t*-test).

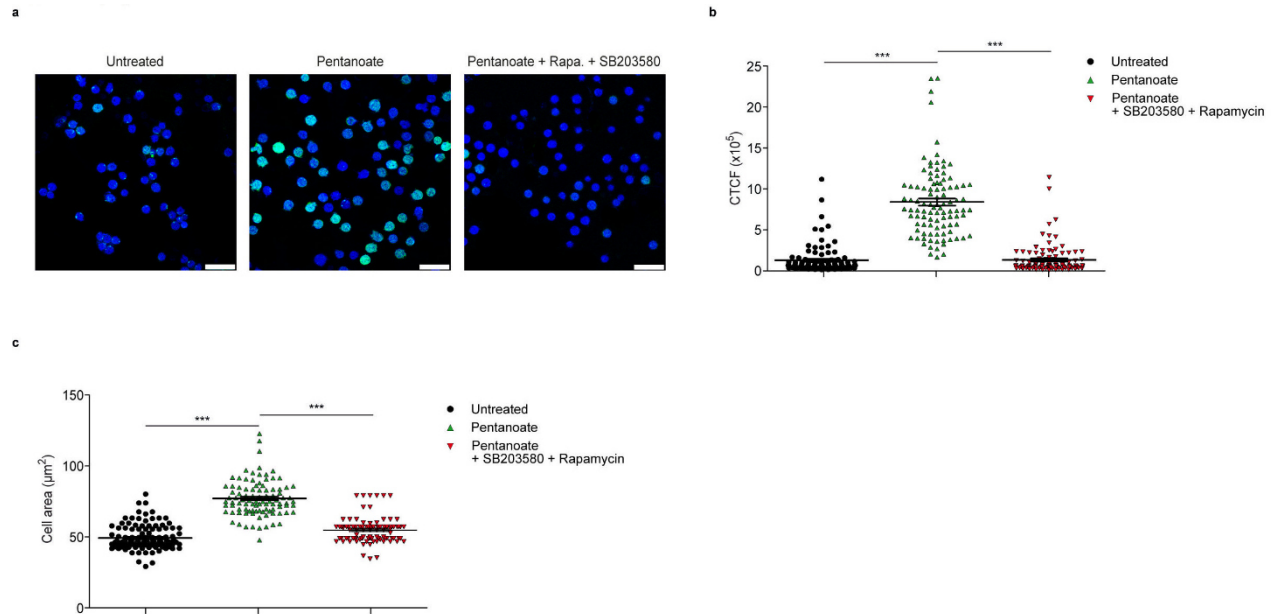

**Supplementary Fig. 6** Impact of pentanoate on the cell size and IL-10 production of Bregs. **a-c** Immunofluorescence analysis of pentanoate-induced Bregs purified from spleens of *FIR*  $\times$  *tiger* mice and cultured in the presence or absence of rapamycin (100 nM) and SB203580 (5  $\mu\text{M}$ ). IL-10<sup>+</sup> cells (**b**, CTCF method) and cell area (**c**) were analyzed by immunofluorescence staining (scale bar = 25 micron). CellTracker Blue CMAC Dye was used for monitoring location of B cells. \*\*\* $P < 0.001$  (Student's *t*-test).

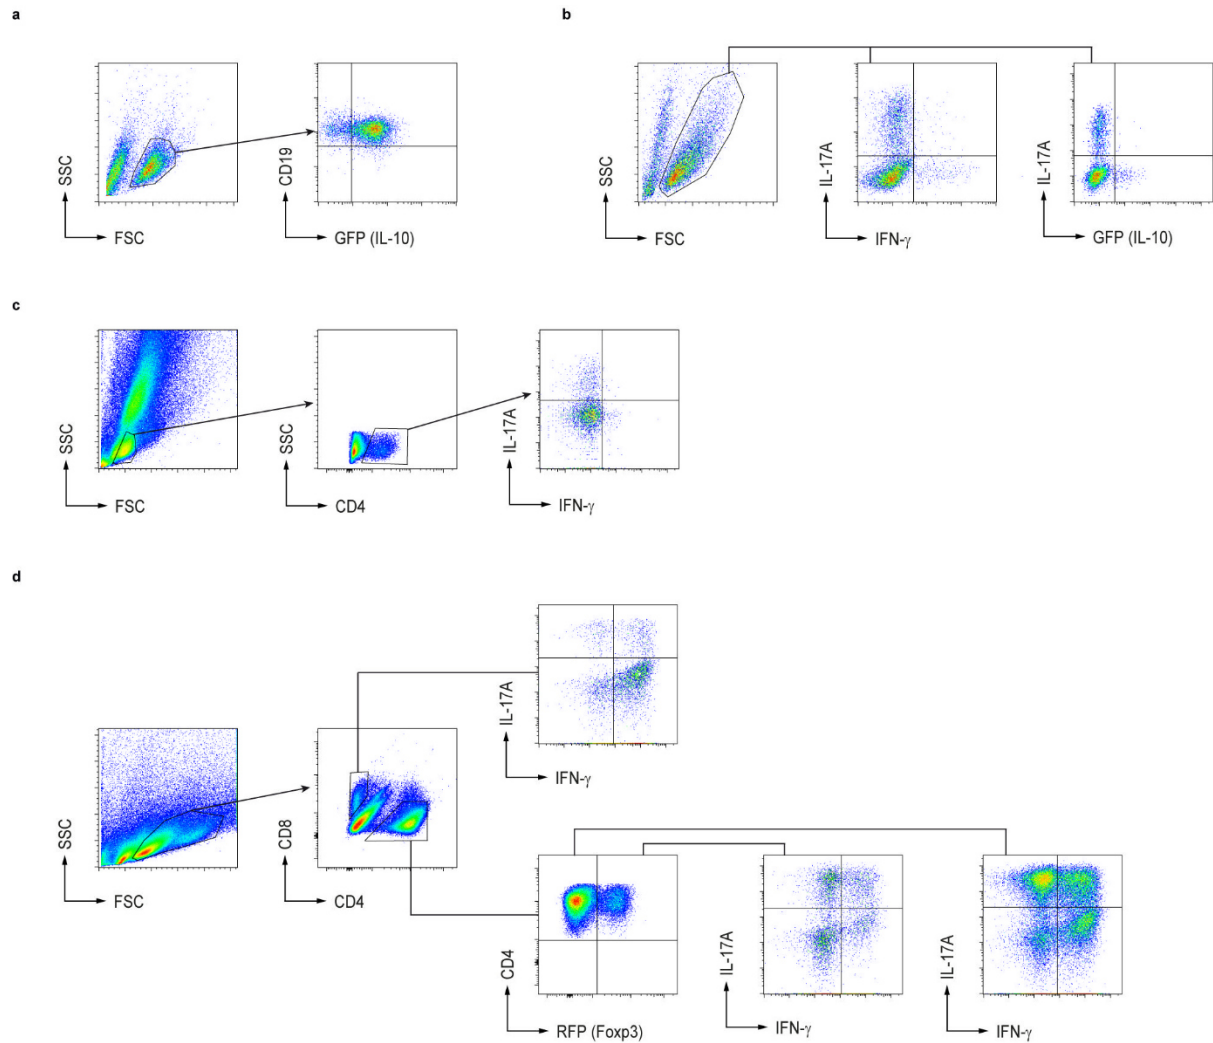

**Supplementary Fig. 7** Representative gating strategy used for cell sorting and FACS analysis of T and B lymphocytes. **a** Gating strategy to sort and analyze Bregs derived from spleen of *FIR* × *tiger* mice for Fig. 4a-f, Fig. 5a-f, Fig. 6a, Fig. 6d and Fig. 6e. **b** Gating strategy for *in vitro* analysis of Th17 cells purified from spleen and LNs of WT and *FIR* × *tiger* mice (Fig. 1a, Fig. 2b and Fig. 3a). **c** Gating strategy to analyze CD4<sup>+</sup> T cells in the intestinal lamina propria (Fig. 1d and Fig. 1f). **d** Gating strategy to analyze the cell number and frequency of T lymphocytes in the CNS. T cells were analyzed for expression of IL-17A and IFN- $\gamma$  (Fig. 1d-f, Fig. 6b,c and Fig. 6f,g).



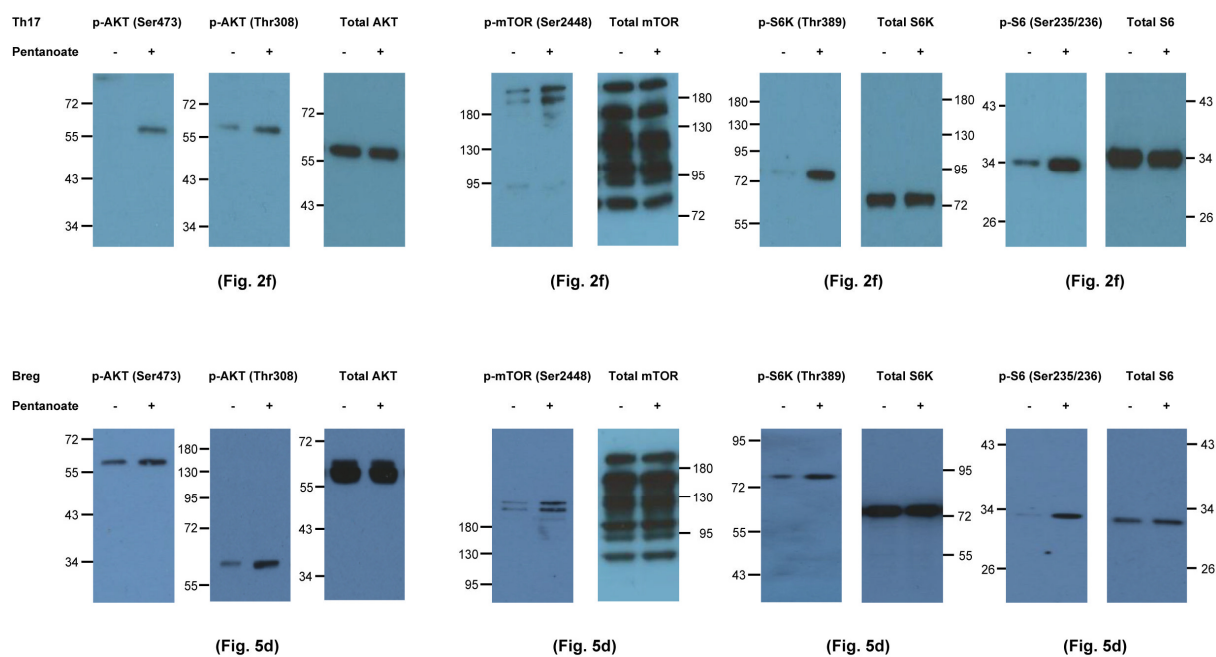

**Supplementary Fig. 8** The uncropped images of western blots used to generate Fig. 2f (Th17 cells) and Fig. 5d (Bregs). All original western blots are accompanied by the localication of molecular weight.
